# Supplementary material for: Influence of Compounding Parameters on Color Space and Properties of Thermoplastics with Ultramarine Blue Pigment
Source: MDPI journal article supplement (doi:10.3390/polym15244718), 2023-12-15
Supplement: s1 [file polymers-2768227-supplementary.pdf › polymers-2768227-supplementary.pdf]

# Influence of Compounding Parameters on Color Space and Properties of Thermoplastics with Ultramarine Blue Pigment

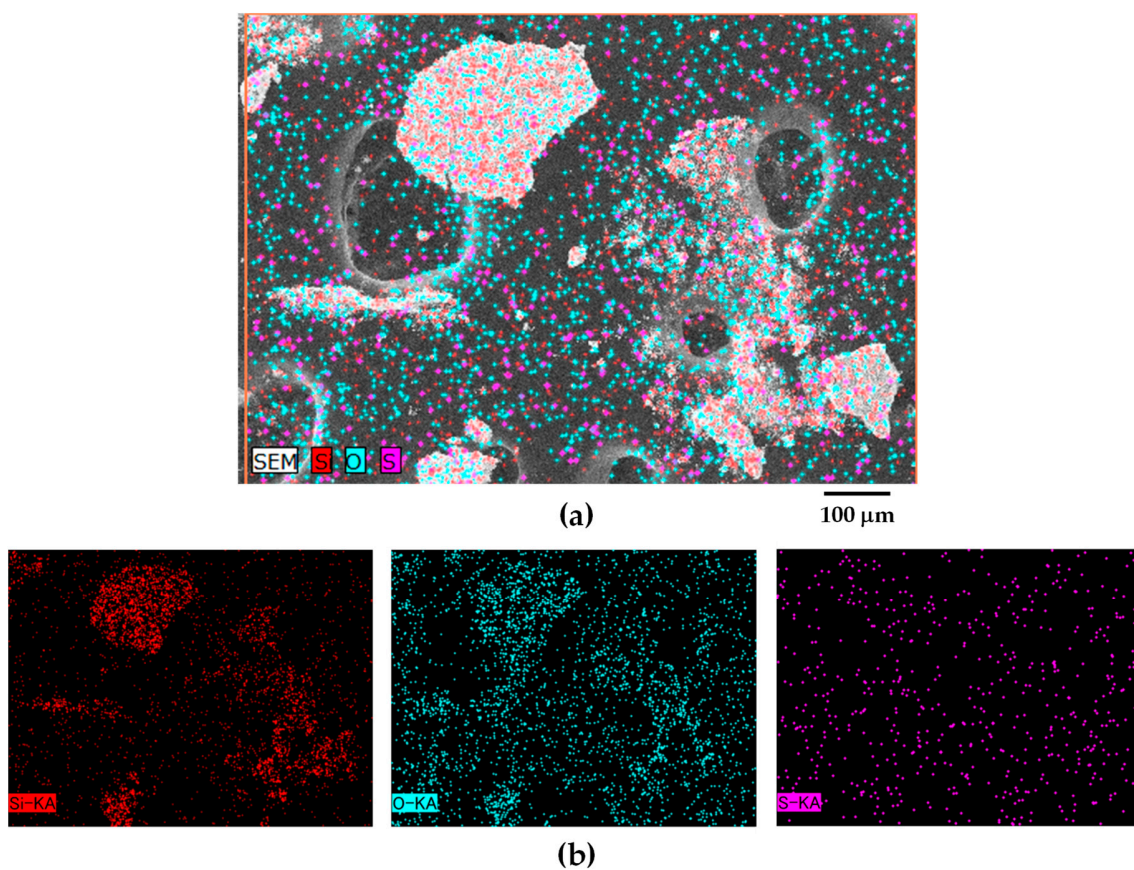

Figure S1 EDS mapping elements of pigment in masterbatch PPCP9 after TGA combustion.

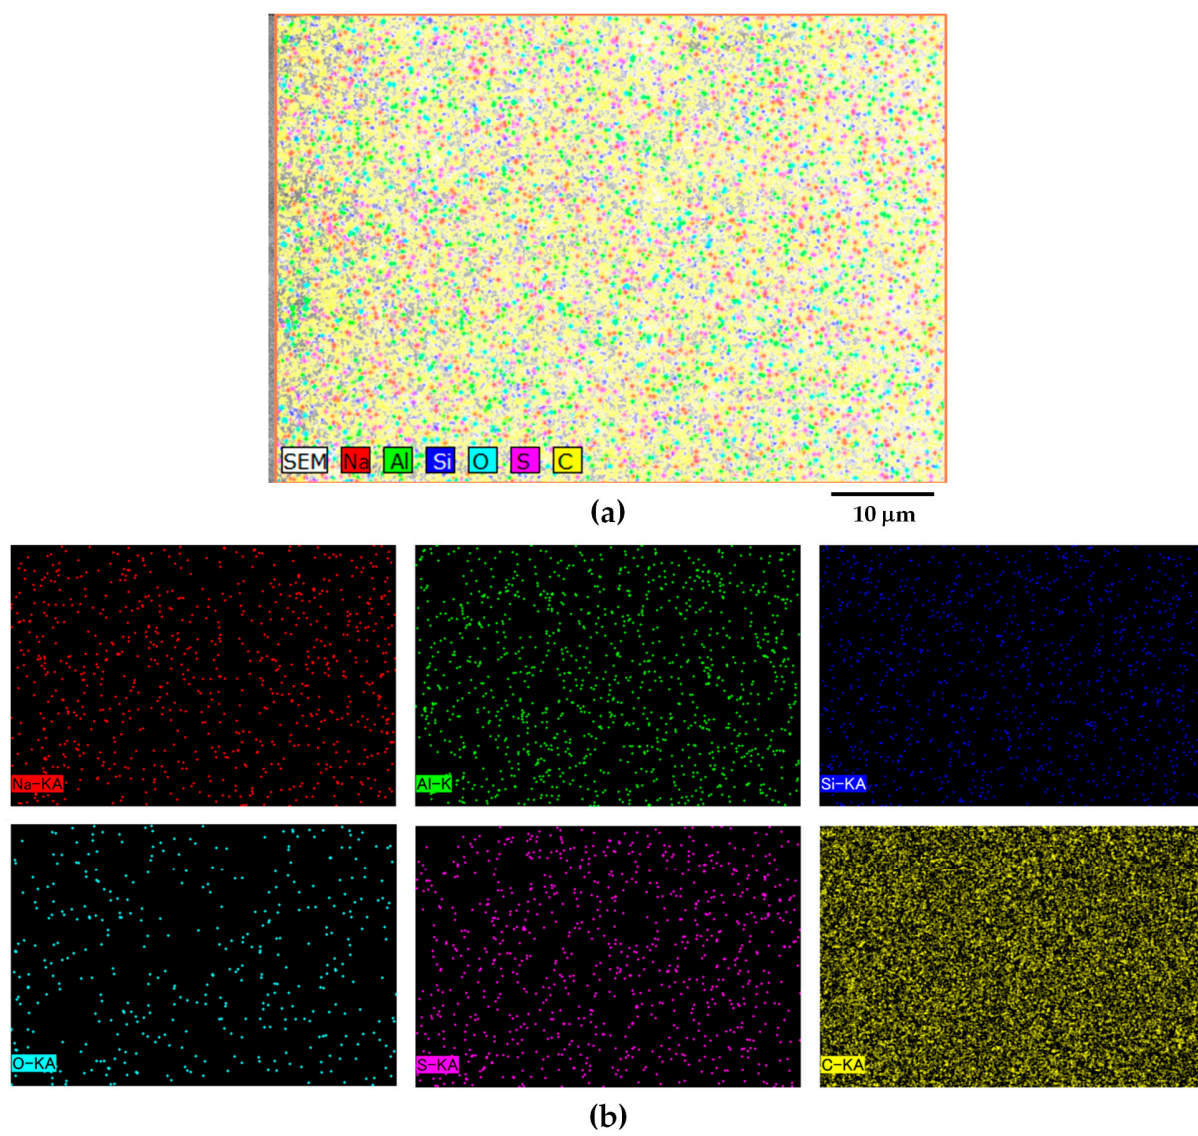

Figure S2 EDS mapping elements of injection molded PPCP9MB0.

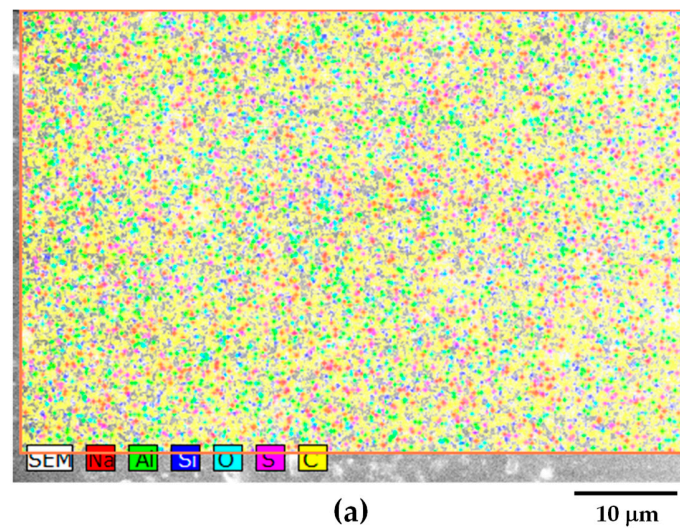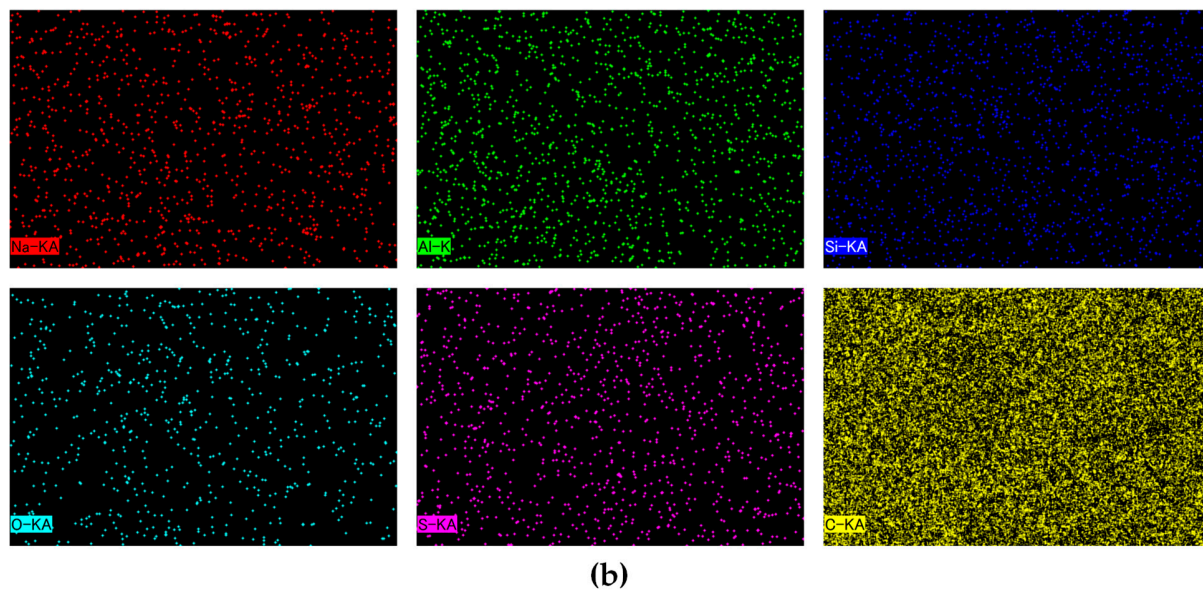

Figure S3 EDS mapping elements of injection molded PPCP9MB3.



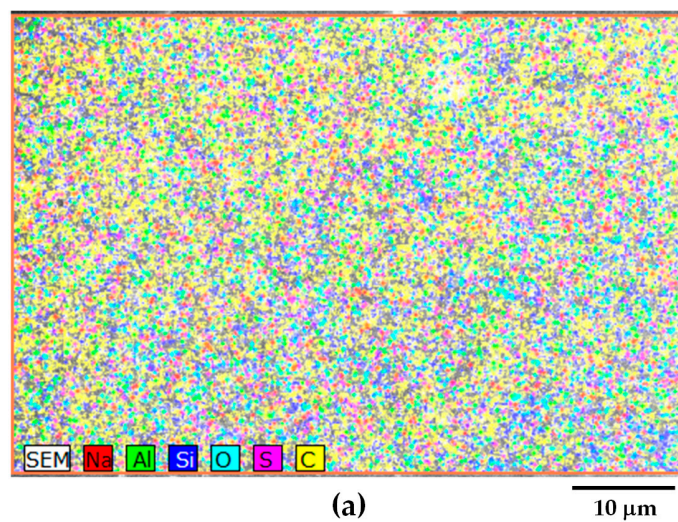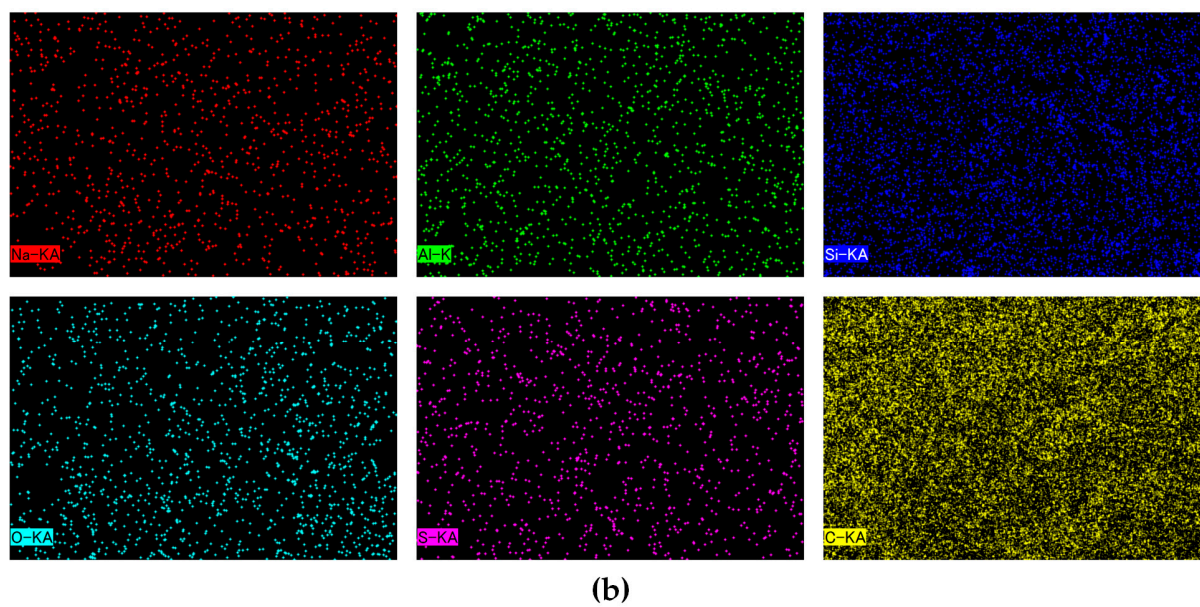

Figure S4 EDS mapping elements of injection molded masterbatch PPCP9.

Table S1 Color spaces of PPCP9 with masterbatch for one-way ANOVA.

| PPCP9   | $L^*$ | $L^*$ | $L^*$ | $a^*$ | $a^*$ | $a^*$ | $b^*$ | $b^*$ | $b^*$ | $C^*$ | $C^*$ | $C^*$ | $h^\circ$ | $h^\circ$ | $h^\circ$ |
|---------|-------|-------|-------|-------|-------|-------|-------|-------|-------|-------|-------|-------|-----------|-----------|-----------|
| MB0     | 65.5  | 65.4  | 66.4  | -0.4  | -0.4  | -0.4  | -0.9  | -1.2  | -1.2  | 1.0   | 1.2   | 1.3   | 248       | 251       | 250       |
| MB1     | 40.5  | 40.6  | 41.2  | 1.0   | 0.8   | 0.9   | -35.6 | -35.0 | -35.6 | 35.6  | 35.1  | 35.6  | 272       | 271       | 271       |
| MB3     | 32.7  | 33.2  | 33.4  | 10.5  | 11.4  | 11.6  | -39.7 | -41.4 | -41.8 | 41.0  | 42.9  | 43.4  | 285       | 285       | 285       |
| MB5     | 31.9  | 31.6  | 31.7  | 16.7  | 16.8  | 17.1  | -44.1 | -44.2 | -44.7 | 47.2  | 47.3  | 47.9  | 291       | 291       | 291       |
| MB3S100 | 32.3  | 32.9  | 32.9  | 11.8  | 12.5  | 12.8  | -40.9 | -42.2 | -42.9 | 42.6  | 44.0  | 44.8  | 286       | 286       | 287       |
| MB3S200 | 32.7  | 33.2  | 33.4  | 10.5  | 11.4  | 11.6  | -39.7 | -41.4 | -41.8 | 41.0  | 42.9  | 43.4  | 285       | 285       | 285       |
| MB3S300 | 32.3  | 33.2  | 33.3  | 9.7   | 11.6  | 11.7  | -37.7 | -41.7 | -42.0 | 38.9  | 43.3  | 43.6  | 284       | 286       | 285       |
| MB3T190 | 32.6  | 33.3  | 33.3  | 11.0  | 12.5  | 12.6  | -39.7 | -42.6 | -43.0 | 41.2  | 44.4  | 44.8  | 285       | 286       | 286       |
| MB3T210 | 32.7  | 33.2  | 33.4  | 10.5  | 11.4  | 11.6  | -39.7 | -41.4 | -41.8 | 41.0  | 42.9  | 43.4  | 285       | 285       | 285       |
| MB3T230 | 32.6  | 33.4  | 33.5  | 10.4  | 12.2  | 12.3  | -39.0 | -42.6 | -43.0 | 40.3  | 44.3  | 44.7  | 285       | 286       | 286       |

Table S2 Color spaces of PPCP30 with masterbatch for one-way ANOVA.

| PPCP30  | $L^*$ | $L^*$ | $L^*$ | $a^*$ | $a^*$ | $a^*$ | $b^*$ | $b^*$ | $b^*$ | $C^*$ | $C^*$ | $C^*$ | $h^\circ$ | $h^\circ$ | $h^\circ$ |
|---------|-------|-------|-------|-------|-------|-------|-------|-------|-------|-------|-------|-------|-----------|-----------|-----------|
| MB0     | 71.0  | 71.2  | 71.3  | -0.9  | -0.9  | -0.9  | -1.6  | -1.6  | -1.6  | 1.9   | 1.8   | 1.8   | 240       | 239       | 239       |
| MB1     | 43.5  | 43.5  | 43.3  | 3.0   | 3.0   | 3.0   | -40.8 | -40.8 | -41.0 | 40.9  | 40.9  | 41.1  | 274       | 274       | 274       |
| MB3     | 35.1  | 35.7  | 35.4  | 11.4  | 13.1  | 13.4  | -44.4 | -47.2 | -47.5 | 45.9  | 49.0  | 49.3  | 284       | 286       | 286       |
| MB5     | 35.0  | 35.6  | 35.4  | 18.1  | 19.4  | 19.6  | -52.4 | -54.7 | -55.0 | 55.5  | 58.1  | 58.4  | 289       | 290       | 290       |
| MB3S100 | 35.6  | 36.0  | 35.6  | 12.8  | 13.7  | 14.1  | -46.8 | -48.3 | -49.0 | 48.5  | 50.2  | 51.0  | 285       | 286       | 286       |
| MB3S200 | 35.1  | 35.7  | 35.4  | 11.4  | 13.1  | 13.4  | -44.4 | -47.2 | -47.5 | 45.9  | 49.0  | 49.3  | 284       | 286       | 286       |
| MB3S300 | 35.6  | 36.4  | 36.1  | 11.4  | 13.6  | 13.9  | -45.2 | -48.6 | -49.0 | 46.6  | 50.4  | 51.0  | 284       | 286       | 286       |
| MB3T190 | 35.1  | 35.6  | 35.4  | 12.1  | 14.2  | 14.5  | -45.0 | -48.5 | -48.7 | 46.6  | 50.6  | 50.8  | 285       | 286       | 287       |
| MB3T210 | 35.1  | 35.7  | 35.4  | 11.4  | 13.1  | 13.4  | -44.4 | -47.2 | -47.5 | 45.9  | 49.0  | 49.3  | 284       | 286       | 286       |
| MB3T230 | 35.9  | 36.6  | 36.4  | 11.8  | 12.6  | 12.6  | -46.0 | -47.8 | -47.9 | 47.5  | 49.5  | 49.5  | 284       | 285       | 285       |

Table S3 Color spaces of ABS with masterbatch for one-way ANOVA.

| ABS     | $L^*$ | $L^*$ | $L^*$ | $a^*$ | $a^*$ | $a^*$ | $b^*$ | $b^*$ | $b^*$ | $C^*$ | $C^*$ | $C^*$ | $h^\circ$ | $h^\circ$ | $h^\circ$ |
|---------|-------|-------|-------|-------|-------|-------|-------|-------|-------|-------|-------|-------|-----------|-----------|-----------|
| MB0     | 73.1  | 72.7  | 72.9  | -1.4  | -1.4  | -1.4  | 7.1   | 7.5   | 7.0   | 7.2   | 7.6   | 7.2   | 102       | 101       | 101       |
| MB1     | 49.2  | 49.2  | 49.6  | -3.6  | -3.6  | -3.6  | -31.8 | -31.2 | -30.9 | 32.0  | 31.4  | 31.2  | 264       | 263       | 263       |
| MB2     | 44.0  | 44.3  | 44.3  | 1.3   | 1.0   | 1.1   | -37.0 | -36.2 | -36.5 | 37.0  | 36.2  | 36.5  | 272       | 272       | 272       |
| MB3     | 40.3  | 40.7  | 41.1  | 5.0   | 4.9   | 4.8   | -39.8 | -38.9 | -38.6 | 40.1  | 39.2  | 38.9  | 277       | 277       | 277       |
| MB5     | 36.9  | 37.2  | 37.5  | 10.4  | 10.2  | 10.1  | -41.6 | -41.1 | -40.8 | 42.9  | 42.4  | 42.0  | 284       | 284       | 284       |
| MB3T190 | 39.7  | 40.2  | 40.6  | 5.6   | 5.3   | 5.5   | -40.0 | -39.0 | -39.5 | 40.4  | 39.3  | 39.8  | 278       | 278       | 278       |
| MB3T210 | 40.3  | 40.7  | 41.1  | 5.0   | 4.9   | 4.8   | -39.8 | -38.9 | -38.6 | 40.1  | 39.2  | 38.9  | 277       | 277       | 277       |
| MB3T230 | 39.9  | 40.3  | 40.6  | 5.6   | 5.2   | 5.4   | -39.7 | -38.8 | -38.9 | 40.1  | 39.1  | 39.3  | 278       | 278       | 278       |
